# Supplementary material
Source: publisher figshare collection journal article supplement (https://tandf.figshare.com/ndownloader/files/13507469)
Supplement: Supplementary file 1 [file 13507469]

**Supplementary Material**

Supplementary material is maintained Open Access by the D4Science e-Infrastructure and is available for download and consultation at

<http://data.d4science.org/workspace-explorer-app?folderId=YW5tbEF1OGNxM3FoZENlS0U1cmY5NUIzR0R1eVZyUGtCbklVTzFYTkRxRlVpWWxTZDlvTnJkeWhPOVZGQVFDMQ>

A complete ZIP package is downloadable at

<http://data.d4science.org/aG1lNkJVbEwzbjdQWkpZUExic0RFSE5nellyU1N1ckpHbWJQNStIS0N6Yz0>
